# Supplementary material for: Regional Delivery of Anti-PD-1 Agent for Colorectal Liver Metastases Improves Therapeutic Index and Anti-Tumor Activity
Source: MDPI journal article supplement (doi:10.3390/vaccines9080807), 2021-07-21
Supplement: s1 [file s1]

Supplementary Figure S1: Raw data of Western Blots

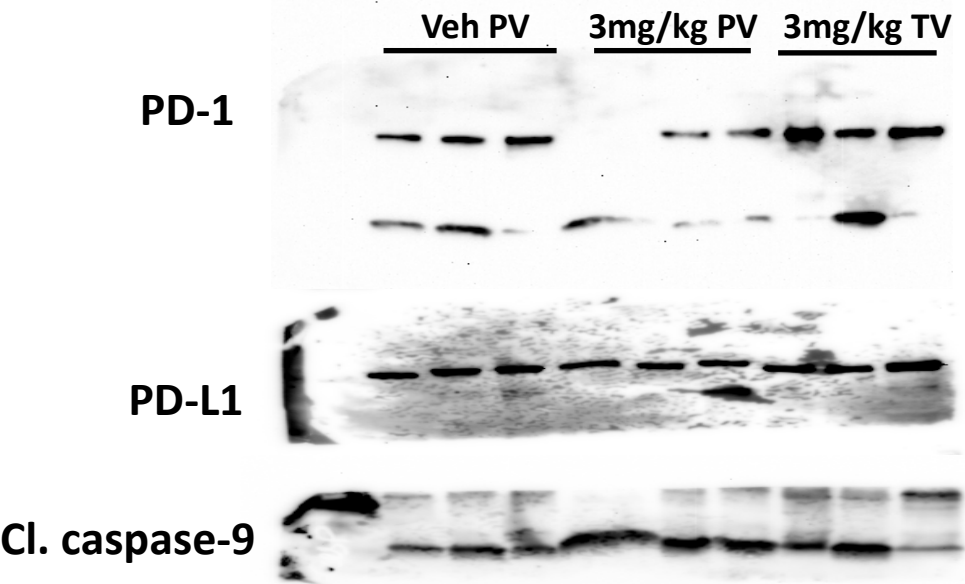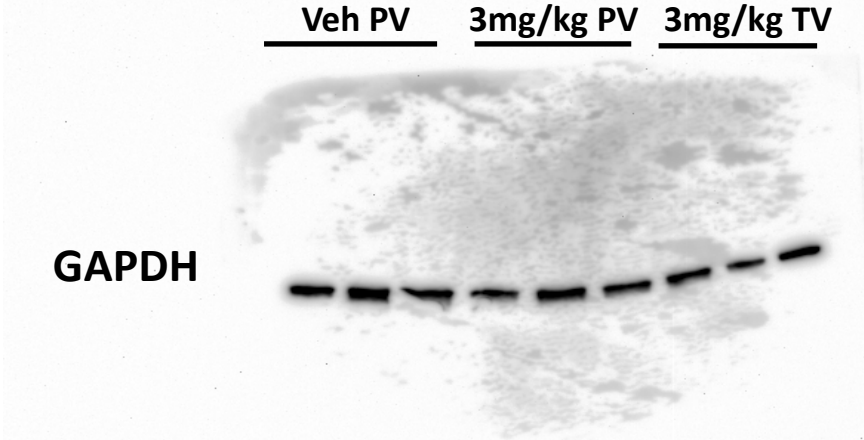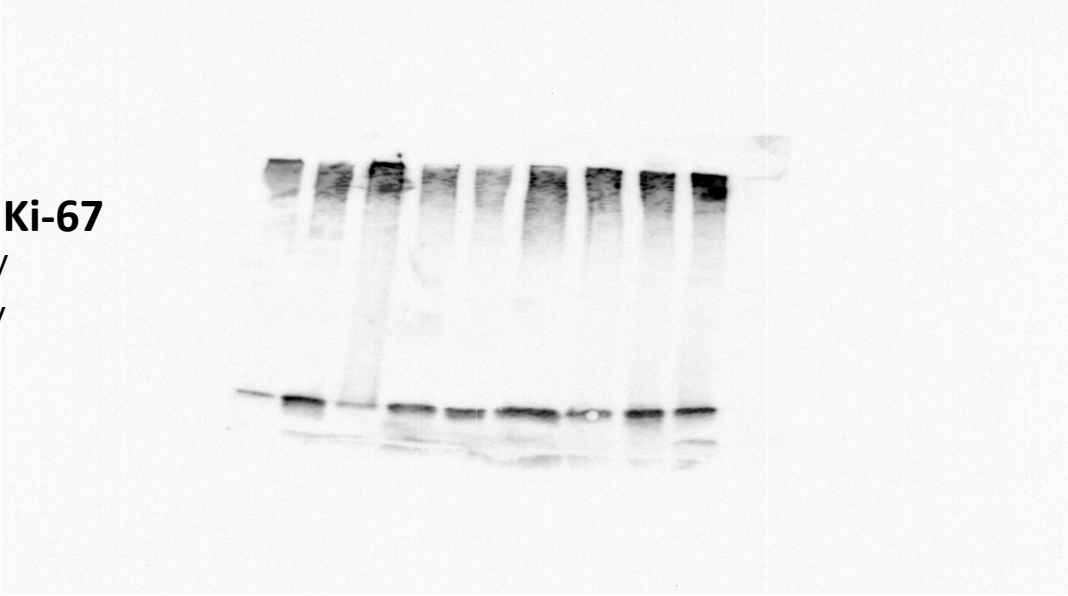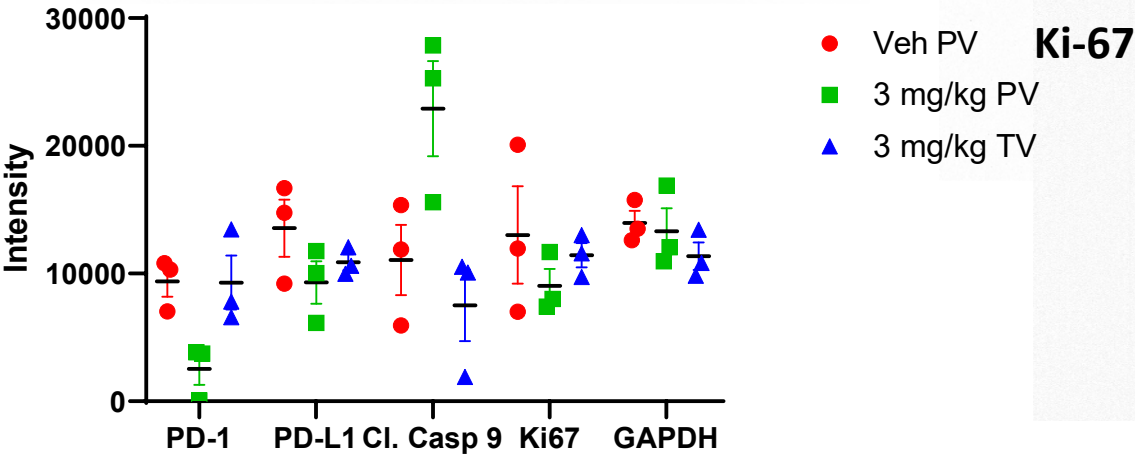

Western blot of reduced protein lysates detected for PD-1, PD-L1, Cleaved caspase-9, Ki-67 and GAPDH. Intensity of individual bands were quantified using ImageJ software. Individual gel band intensity for each protein was plotted as shown in the graph.
